# Supplementary material for: Compound 18 Improves Glucose Tolerance in a Hepatocyte TGR5-dependent Manner in Mice
Source: PubMed Central journal article supplement (PMC7400836; doi:10.3390/nu12072124), 2020-07-17
Supplement: nutrients-12-02124-s001.pdf [file nutrients-12-02124-s001.pdf]

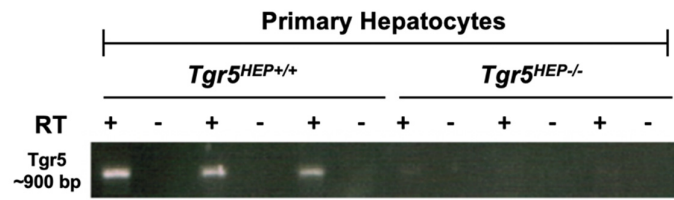

**Supplemental Figure 1.** Validation of hepatocyte-specific TGR5 knockout mouse model. RT-PCR for *Tgr5* expression in hepatocytes isolated from *Tgr5*<sup>HEP+/+</sup> and *Tgr5*<sup>HEP-/-</sup> mice. *n*=3 per group. (+) indicates that the RT enzyme was present during the RT reaction; (-) indicates that the RT enzyme was not present during the RT reaction.
